# Supplementary material for: Effects of Catalyst Ink Storage on Polymer Electrolyte Fuel Cells
Source: MDPI journal article supplement (doi:10.3390/en16197011), 2023-10-09
Supplement: s1 [file s1]

# Effects of Catalyst Ink Storage on Polymer Electrolyte Fuel Cells

## Supporting information

Mario Kircher<sup>1\*</sup>, Michaela Roschger<sup>1</sup>, Wai Yee Koo<sup>2</sup>, Fabio Blaschke<sup>1</sup>, Maximilian Grandi<sup>1</sup>, Merit Bodner<sup>1</sup>, Viktor Hacker<sup>1</sup>

<sup>1</sup>Institute of Chemical Engineering and Environmental Technology (CEET), Graz University of Technology, Inffeldgasse 25C, 8010 Graz, Austria

<sup>2</sup>UTP Universiti Teknologi PETRONAS, Chemical Engineering Department, Persiaran UTP, 32610 Seri Iskandar, Malaysia

\*correspondance: [mario.kircher@tugraz.at](mailto:mario.kircher@tugraz.at)

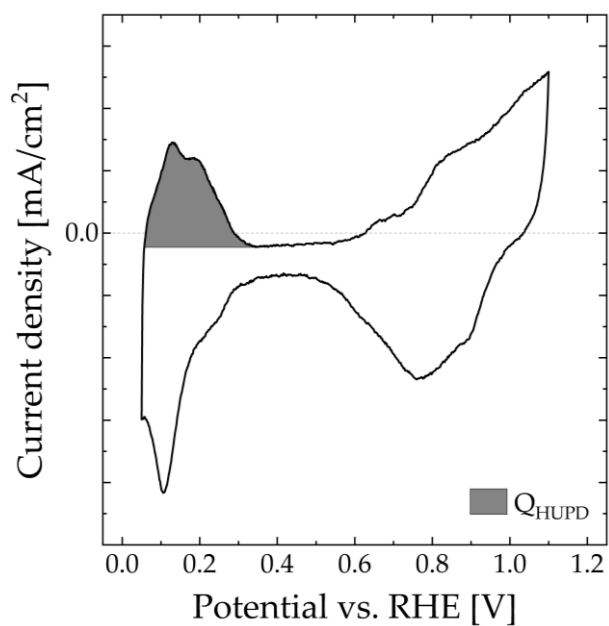

Figure S1: Cyclic voltammogram with integrated hydrogen desorption peak for ECSA evaluation

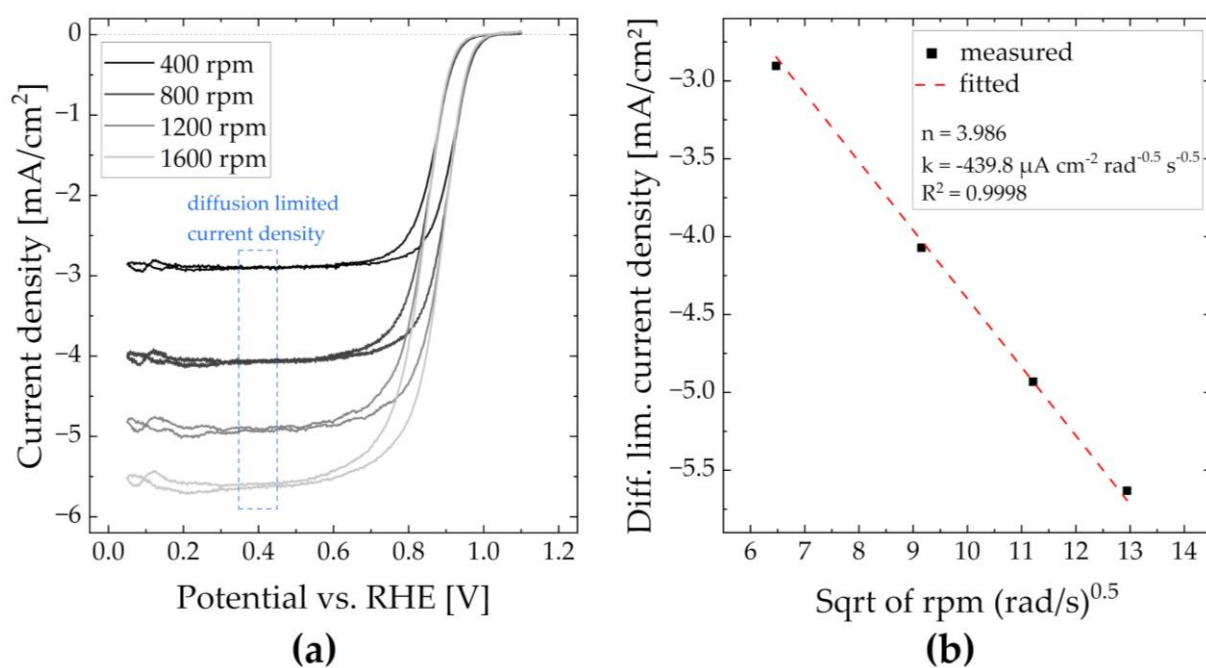

Figure S2: ORR activity (CV) recorded with RDE at varying rotational speeds (a); mean diffusion limited current density over the square root of the rotational speed for with linear fit for Koutecky-Levich analysis (b)

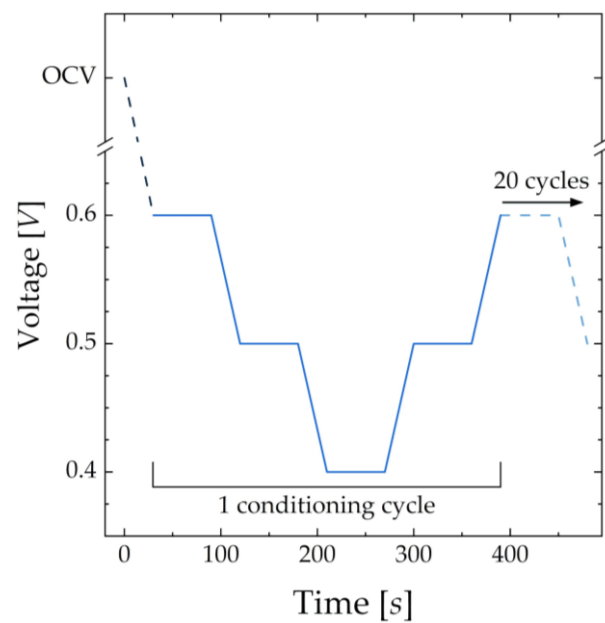

Figure S3: Potential profile used as conditioning method for MEAs

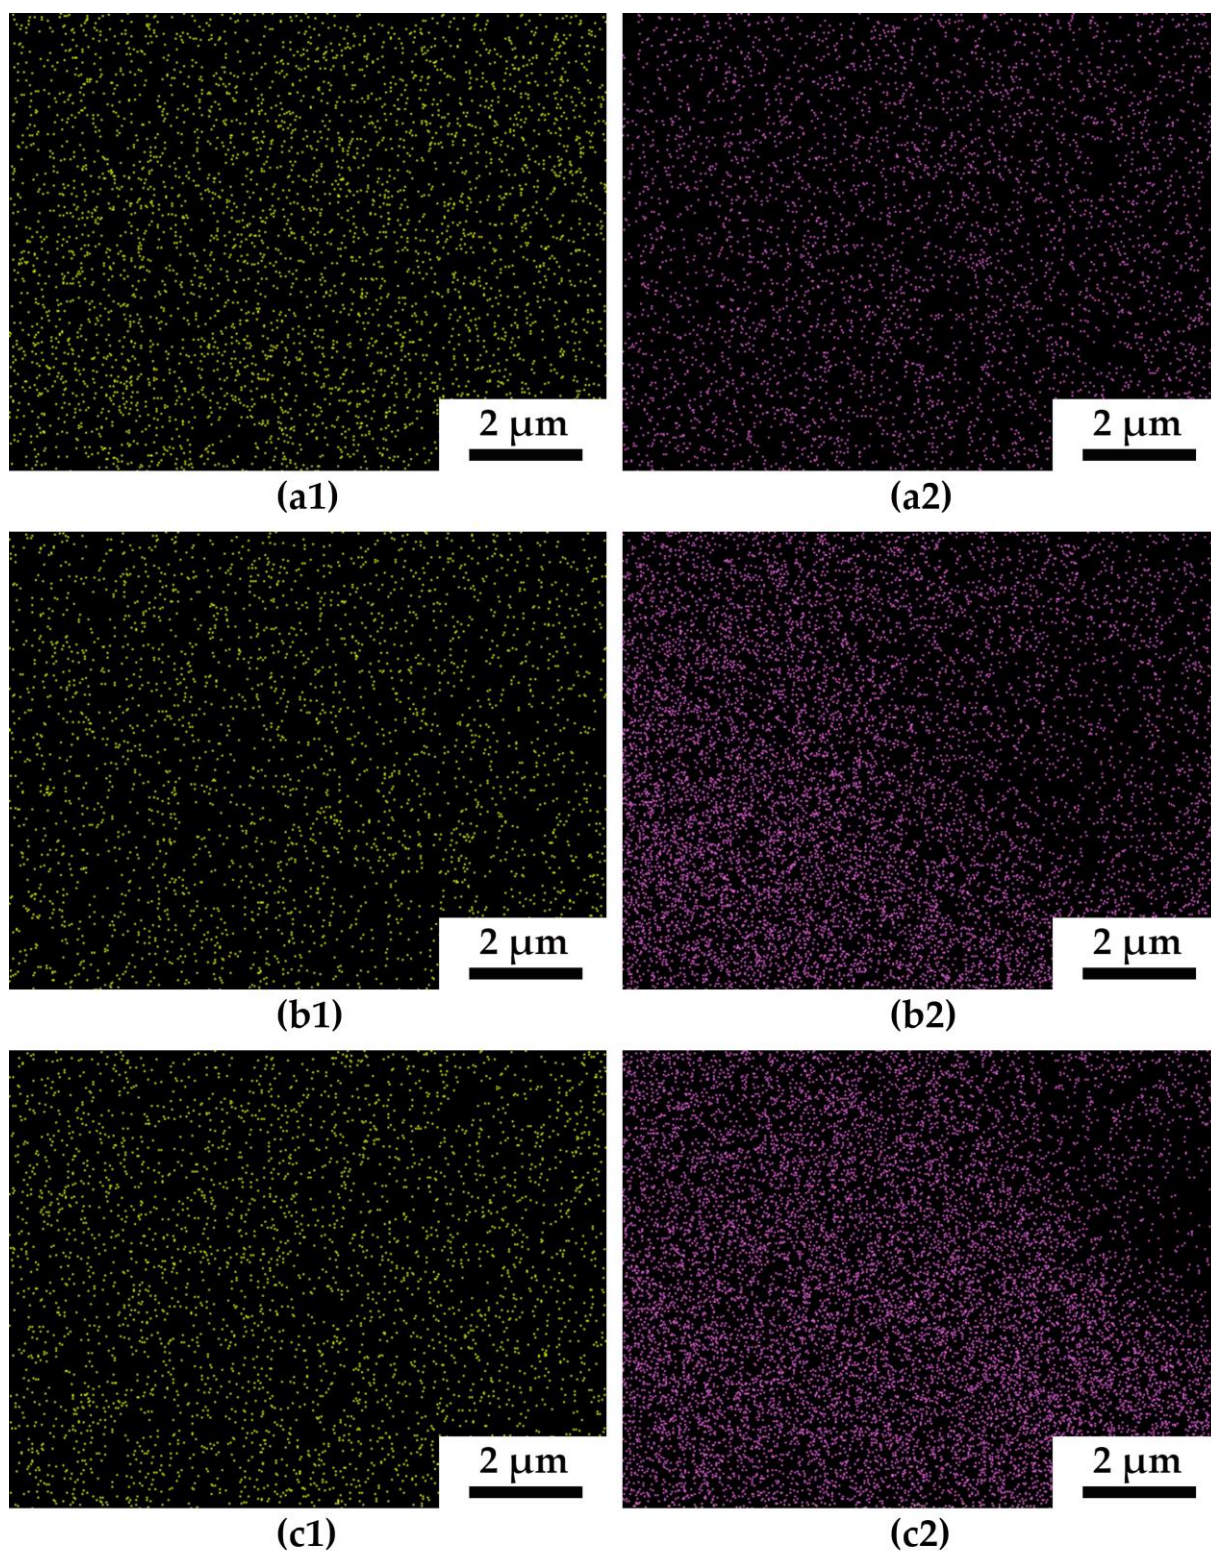

Figure S4: SEM-EDX images of CLs of MEA-0 (a), -672 (b) and -EX (c) for catalyst (Pt La) (1) and Nafion (F Ka) (2)



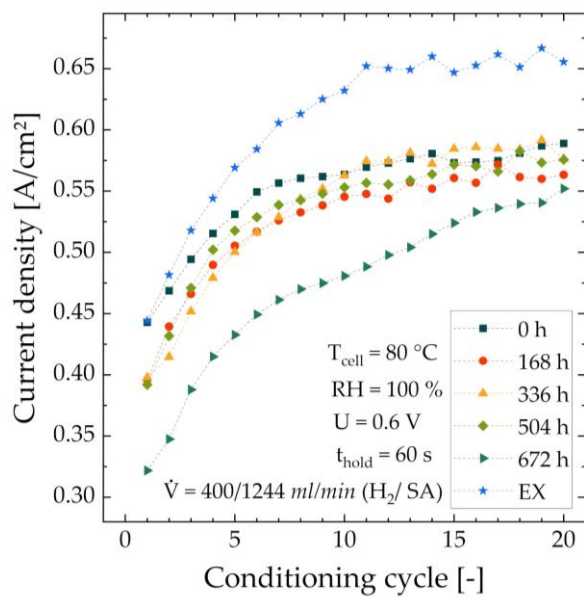

(a)

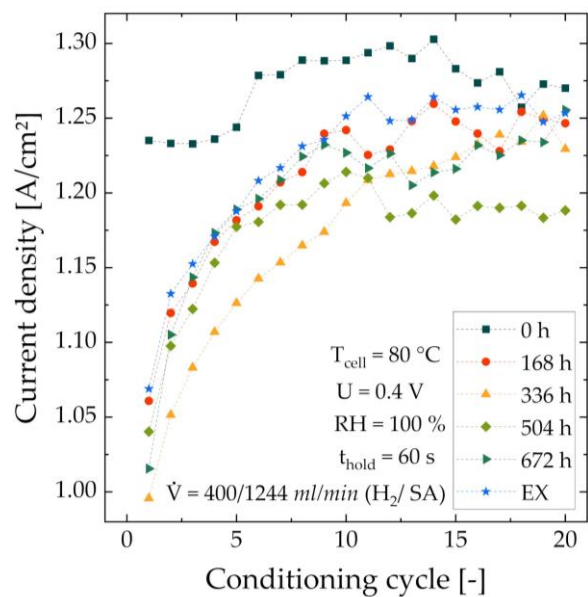

(b)

Figure S5: Current density evolution (mean over the holding time of each voltage step) during the conditioning process for all MEAs characterized at 0.6 V (a) and 0.4 V (b)

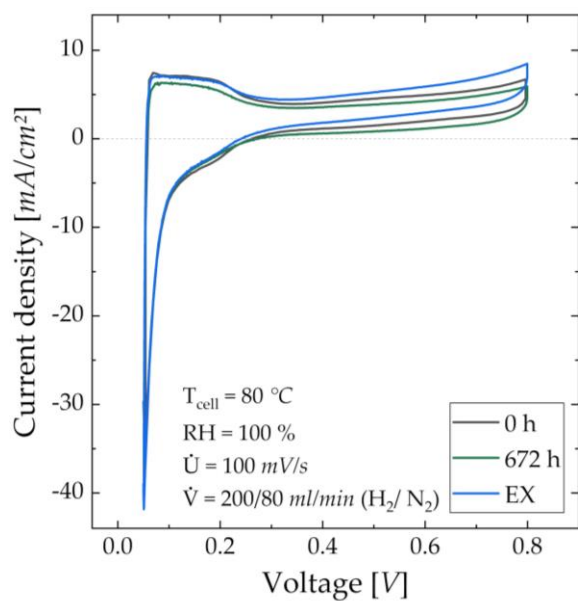

(a)

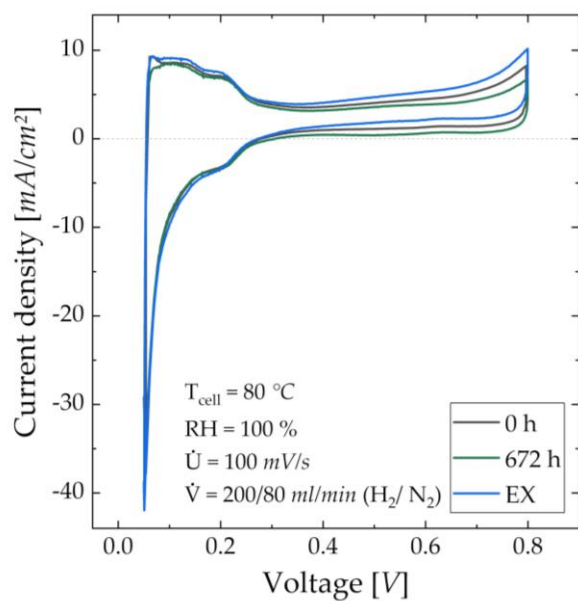

(b)

Figure S6: CVs of MEA-0, -672 and -EX before conditioning (a) and after conditioning (b)

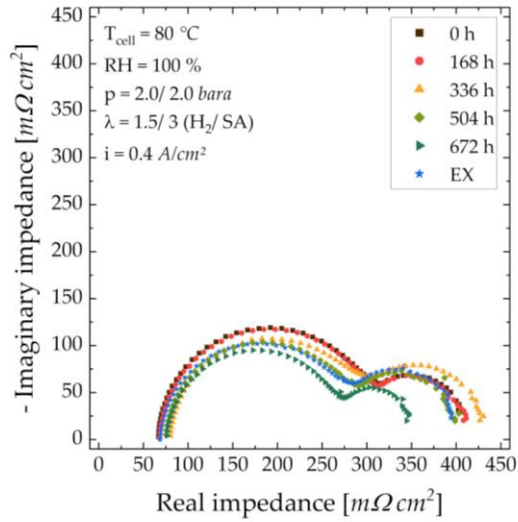

(a)

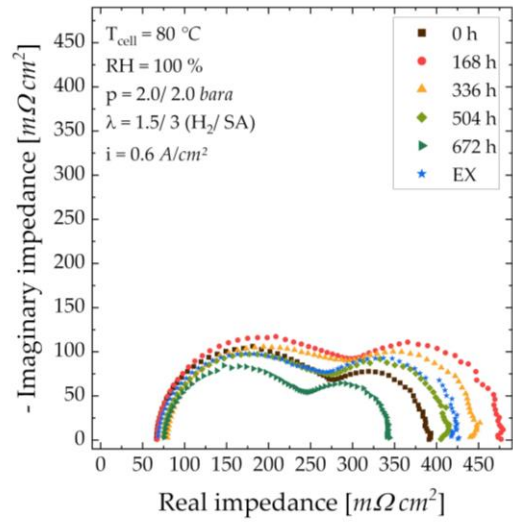

(b)

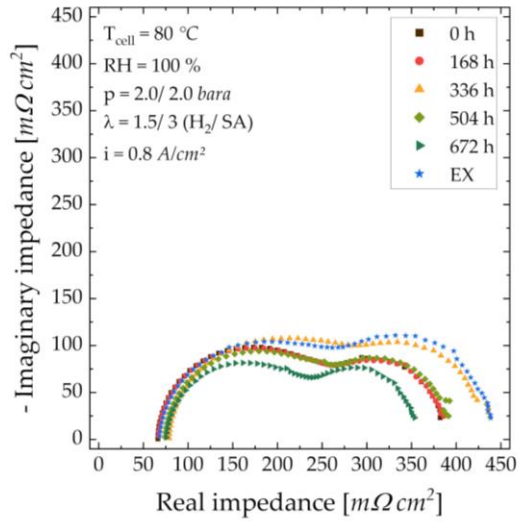

(c)

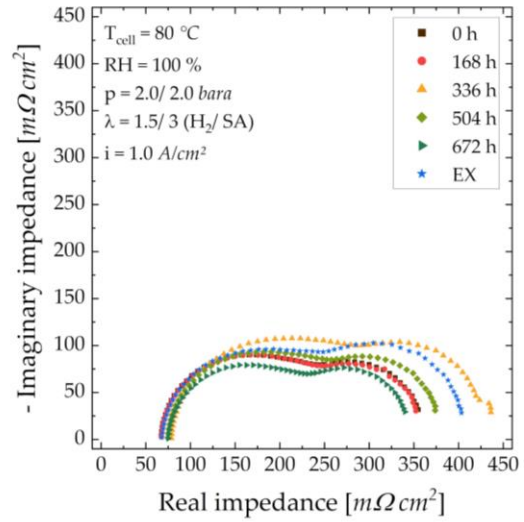

(d)

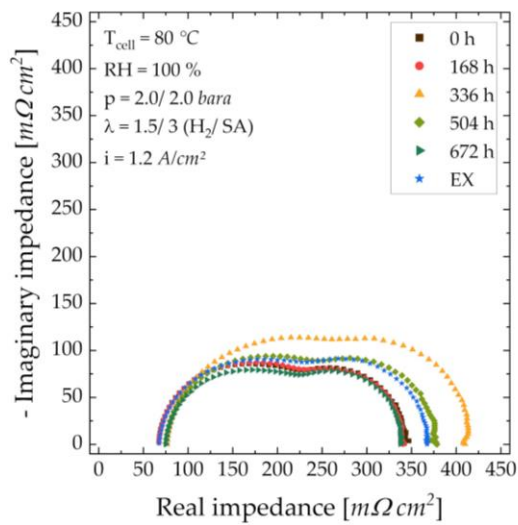

(e)

Figure S7: Impedance spectra recorded by EIS for all MEAs characterized at  $0.4 \text{ A/cm}^2$  (a),  $0.6 \text{ A/cm}^2$  (b),  $0.8 \text{ A/cm}^2$  (c),  $1.0 \text{ A/cm}^2$  (d) and  $1.2 \text{ A/cm}^2$  (e)
