# Supplementary material for: Effects of Catalyst Ink Storage on Polymer Electrolyte Fuel Cells
Source: MDPI journal article supplement (doi:10.3390/en16197011), 2023-10-09
Supplement: s1 [file s1]

Archive with 1 entries (1 files):
- energies-2624600-supplementary.pdf
